# Supplementary material for: OLA1 is responsible for normal spindle assembly and SAC activation in mouse oocytes
Source: PeerJ. 2020 Jan 3;8:e8180. doi: 10.7717/peerj.8180 (PMC6944127; doi:10.7717/peerj.8180)
Supplement: File S1 [file peerj-08-8180-s001.xlsx]

## Sheet: Sheet1
Figure 1B					Figure 2B			Figure 2C			Figure 2D			Figure 2E
GV	GVBD	MI	MII		Control	RNAi		Control	RNAi		Control	RNAi		Control	RNAi
1.28295	1.20658	0.781729	0.500246		0.276477	0.121168		88.1	63.64		64.29	40		72.973	62.8571
1.21697	1.08842	0.685649	0.412332		0.29776	0.139781		80	63.74		52.86	42.86		66.0714	67.2414
1.31532	0.951014	0.706335	0.507131		0.288135	0.131474		92	61.11		64	38.89		69.5652	63.6364
					p<0.0001	*		p=0.0028	*		p=0.0074	*		P=0.1084
Figure 3B			Figure 3C				Figure 4C
Control	RNAi		Control	RNAi			Control	RNAi		Control	RNAi
10	30.7692		6.66667	11.5385		MI	87.5	76.1905	A/TI	4.16667	14.2857
12.9032	29.4118		9.67742	14.7059			85.1852	74.0741		3.7037	18.5185
11.1111	30		7.40741	13.3333			91.3043	73.913		0	17.3913
p<0.0001	*		p=0.0149	*			p=0.0023	*		p=0.0015	*
